# Supplementary material
Source: Springer Nature journal article supplement (https://www.springermedizin.de/resource/supplementary/12885_2010_2580_MOESM3_ESM.pdf/9462600)

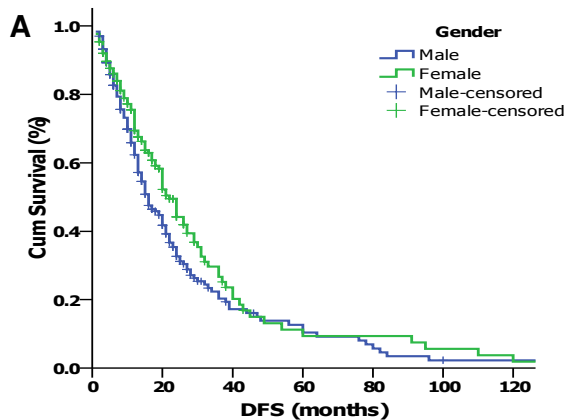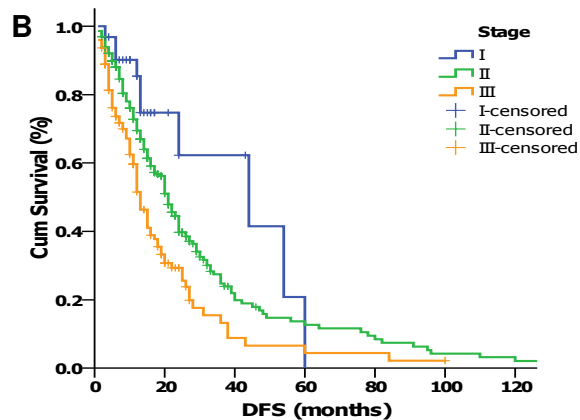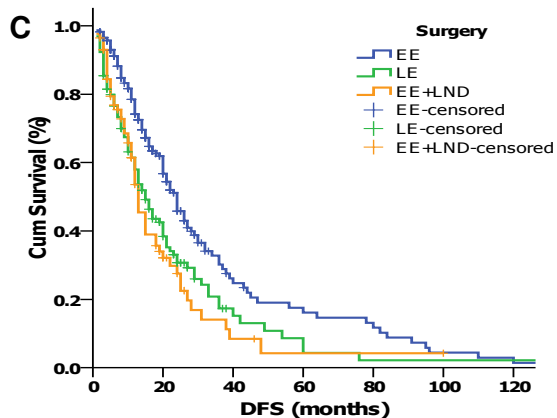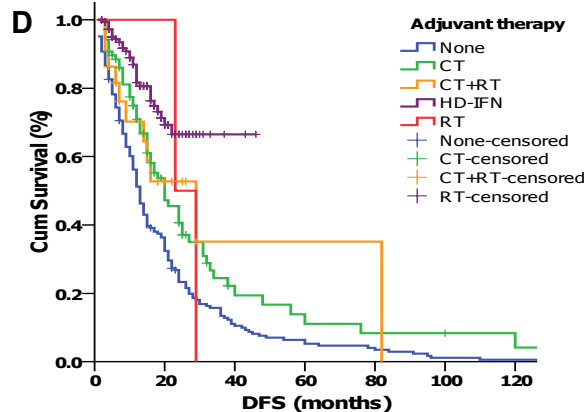

Supplement: MOESM3 [file 9462600]
